# Supplementary material for: Analysis of preoperative circulating tumor cells for recurrence in patients with hepatocellular carcinoma after liver transplantation
Source: PubMed Central journal article supplement — Ann Transl Med. 2020 Sep;8(17):1067. doi: 10.21037/atm-20-2751 (PMC7575976; doi:10.21037/atm-20-2751), 2020-09
Supplement: atm-08-17-1067-dss.pdf [file atm-08-17-1067-dss.pdf]

## Data Sharing Statement

|                     |                                                                                                                                                    |                                                                                                                                                                                                                       |
|---------------------|----------------------------------------------------------------------------------------------------------------------------------------------------|-----------------------------------------------------------------------------------------------------------------------------------------------------------------------------------------------------------------------|
| <b>Article Info</b> | http://dx.doi.org/10.21037/atm-20-2751                                                                                                             |                                                                                                                                                                                                                       |
| <b>Item</b>         | <b>Question</b>                                                                                                                                    | <b>Authors' Response<br/>(place "-" if not applicable)</b>                                                                                                                                                            |
| 1                   | Would you like to share data collected for your study to others?                                                                                   | Yes                                                                                                                                                                                                                   |
| 2                   | If not, would you like to share the reason for your decision?                                                                                      | -                                                                                                                                                                                                                     |
| 3                   | What data in particular will be shared?                                                                                                            | The data will be shared that CTCs result is closely related to the early recurrence of patients with HCC after LT, and patients in the CTC-positive group had a worse prognosis than those in the CTC-negative group. |
| 4                   | Any other documents will be share? Such as study protocol, statistical analysis plan, informed consent form, clinical study report, analytic code. | Statistical analysis plan, informed consent form, and clinical study report will also be shared if requested.                                                                                                         |
| 5                   | When will data availability begin?                                                                                                                 | From the publication date.                                                                                                                                                                                            |
| 6                   | When will data availability end?                                                                                                                   | One years within the publication date, since the technique or survival date may be updated over time.                                                                                                                 |
| 7                   | To whom will you share the data?                                                                                                                   | Liver transplant and oncology surgeons who are interested in studies of CTC and OLT.                                                                                                                                  |
| 8                   | For what type of analysis or purpose?                                                                                                              | For analysis to evaluate the predictive valuable of CTCs for recurrence in patients with HCC after LT.                                                                                                                |
| 9                   | How or where can the data/documents be obtained?                                                                                                   | Emails could be sent to the address below to obtain the shared data:<br><a href="mailto:chenzht6@mail2.sysu.edu.cn">chenzht6@mail2.sysu.edu.cn</a> . or chenmg3@mail.sysu.edu.cn                                      |
| 10                  | Any other restrictions?                                                                                                                            | We may balance the potential benefits and risks for each request and then provide the data that could be shared.                                                                                                      |
